# Supplementary material for: Principles of mRNA control by human PUM proteins elucidated from multimodal experiments and integrative data analysis
Source: PubMed Central journal article supplement — RNA. 2020 Nov;26(11):1680–703. doi: 10.1261/rna.077362.120 (PMC7566576; doi:10.1261/rna.077362.120), 2020-11
Supplement: supp_077362.120_Supplemental_Fig_S4.pdf [file supp_077362.120_Supplemental_Fig_S4.pdf]

## A. Regex

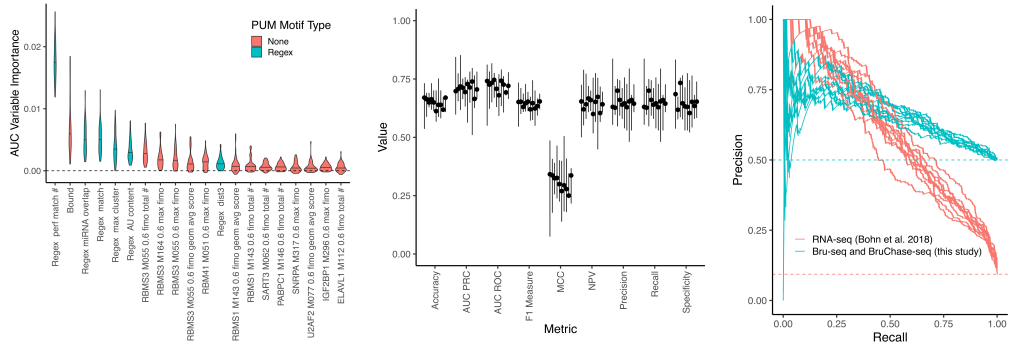

## B. Hafner PUM2

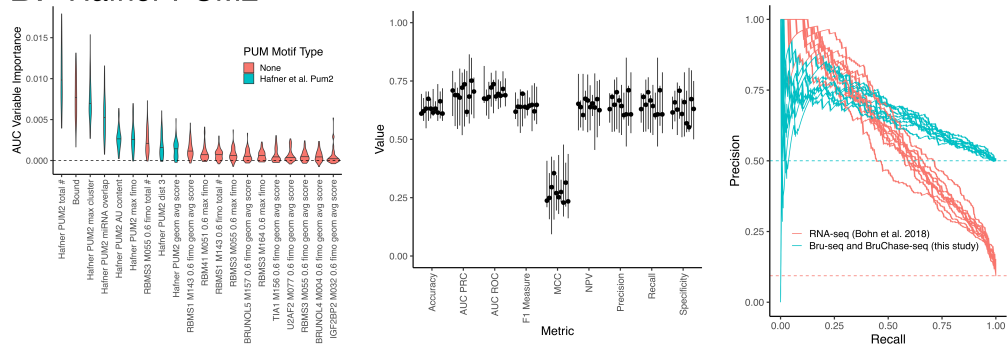

## C. SEQRS PUM1

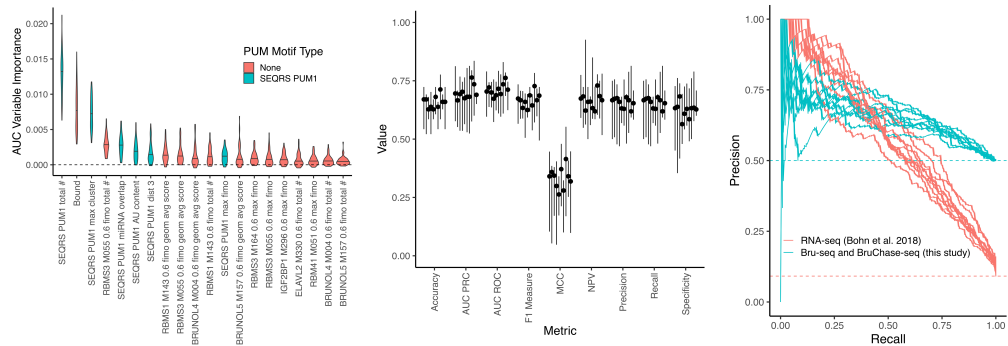

## D. SEQRS PUM2

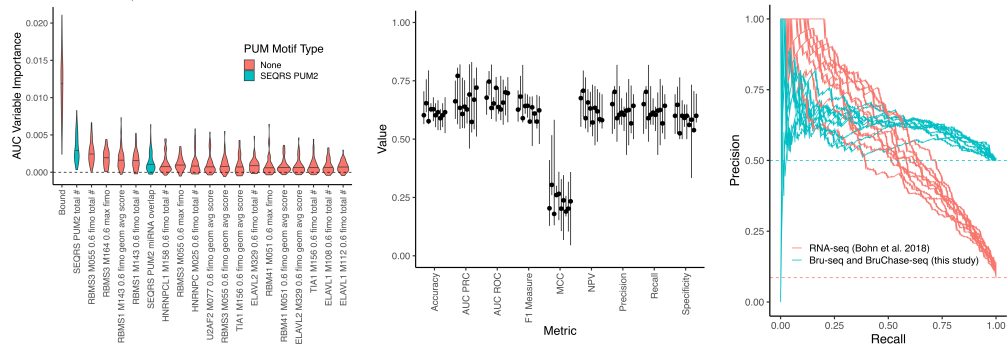

---

Figure S4 (*previous page*): Predicting PUM-mediated effect subset by motif. **A)** Conditional random forest models for the datasets considering only genes that had at least one match to the regex motif definition in a 3' UTR. PRE features only consider those around the regex definition. Panels are as in Figure 6B, D, and F. **B)** As in A), but for the Hafner et al. [34] PUM2 motif. **C)** As in A), but for the SEQRS PUM1 motif. **D)** As in A), but for the SEQRS PUM2 motif.
